# Supplementary material
Source: ML conference proceedings conference paper supplement (https://openreview.net/forum?id=7Z25QbOv4a)
Supplement: supplementary_material [file Informed Consent Agreement.pdf › code&benchmark&details/Informed Consent Agreement.pdf]

# Manual Out-of-Tree Patch Code Migration Experiment

You are invited to participate in a research experiment to study the workflow and effort involved in manual out-of-tree patch code migration across software versions. Please read this document carefully before agreeing to participate.

## 1. Purpose

This experiment aims to collect data on the time, challenges, and strategies employed by developers during manual cross-version code migration tasks.

## 2. Procedures

- You will perform manual out-of-tree patch code migration tasks on provided codebases across specified version increments.
- All work will be completed on provided machines in a controlled laboratory environment.
- Your workflow, time spent, and intermediate outputs will be recorded for analysis.

## 3. Duration

- 3 weeks total.
- 5 days per week (Monday–Friday).
- 8 hours per day during normal working hours (e.g., 9:00 AM – 5:00 PM).

## 4. Compensation

- \$100 USD per day, paid in full upon completion of the experiment.
- Pro-rated compensation will be provided if you withdraw early.

## 5. Risks and Discomforts

- No anticipated physical, psychological, or emotional risks.
- Tasks resemble normal software maintenance work and require standard developer focus.

## **6. Confidentiality**

- Your identity and personal data will be anonymized in all publications/reports.
- Raw data (e.g., code, timestamps) will be stored securely and used solely for research purposes.

## **7. Voluntary Participation**

- Participation is voluntary.
- You may withdraw at any time without penalty or loss of benefits.

## **Participant's Statement of Agreement**

By signing below, I confirm that:

1. I understand the purpose, procedures, and requirements of this experiment.
2. I voluntarily agree to participate.
3. I may withdraw at any time without consequence.

**Participant Signature:** \_\_\_\_\_

**Name (Printed):** \_\_\_\_\_

**Date:** \_\_\_\_\_

**Investigator Signature:** \_\_\_\_\_

**Date:** \_\_\_\_\_
